# Supplementary material
Source: PubMed Central journal article supplement (PMC4403652)
Supplement: JB.02510-14_zjb999093588so1.pdf [file JB.02510-14_zjb999093588so1.pdf]

**TABLE S1.** AFS freeze-substitution procedure for cell suspensions.\*

| <b>Step</b>       | <b>Temp (°C)</b> | <b>Time (h)</b> | <b>Gradient (°C h<sup>-1</sup>)</b> |
|-------------------|------------------|-----------------|-------------------------------------|
| <b>T1</b>         | -90              | 48              |                                     |
| <b>S1</b>         |                  | 6               | 5                                   |
| <b>T2</b>         | -60              | 20              |                                     |
| <b>S2</b>         |                  | 18              | 5                                   |
| <b>**Paused</b>   | -30              | 10              |                                     |
| <b>S2 (cont.)</b> |                  | 12 (remaining)  | 5                                   |
| <b>T3</b>         | 20               | 24              |                                     |

\*Substitution medium at T1-T3 was 1% glutaraldehyde, 0.1% tannic acid and 1% OsO<sub>4</sub> in anhydrous acetone.

\*\*The cycle was paused at -30 °C (6 h into S2) to avoid two programming steps.
